# Supplementary material for: Bioactivities and molecular networking-based elucidation of metabolites of potent actinobacterial strains isolated from the Unkeshwar geothermal springs in India
Source: Royal Society of Chemistry journal article supplement (doi:10.1039/c8ra09449g), 2019-01-01
Supplement: c8ra09449g1.pdf [file c8ra09449g1.pdf]

Electronic Supplementary Material (ESI) for RSC Advances.  
This journal is © The Royal Society of Chemistry 2018

**Diversity, bioactivities and molecular networking based elucidation of metabolites of the potent  
actinobacterial strains isolated from Unkeshwar geothermal spring, India.**

Gajanan T. Mehetre<sup>a,b</sup>, Vinodh J S<sup>a</sup>, Bhushan Burkul<sup>c</sup>, Desai D<sup>d</sup>, Santhakumari B<sup>c</sup>, Mahesh S. Dharne<sup>a,b</sup>, Syed  
G. Dastager<sup>a,b\*</sup>

<sup>a</sup> NCIM Resource centre, CSIR-National Chemical Laboratory, Pune, India

<sup>b</sup> Academy of Scientific and Innovative Research (AcSIR), New Delhi, India

<sup>c</sup> Centre for Materials Characterization, CSIR-National Chemical Laboratory, Pune, India

<sup>d</sup> National center for nanoscience and nanotechnology, University of Mumbai, India

## Supplementary Tables

**Table S1** The 16S rRNA gene sequence similarity with validly published type strains (EzTaxon database) of the representative strains of each genus along with the accession numbers.

| Sr. No | Strain name | Closest match in the database (EzTaxon)                      | 16S rRNA gene Similarity (%) | Accession numbers |
|--------|-------------|--------------------------------------------------------------|------------------------------|-------------------|
| 1      | GHP2B       | <i>Brevibacterium pityocampae</i> DSM 21720 (T) (EU484189)   | 99.56% (1357/1363)           | MF101689          |
| 2      | GHP77       | <i>Cellulomonas carbonis</i> T26(T) (HQ702749)               | 99.54% (1309/1315)           | MF101705          |
| 3      | UAC259      | <i>Corynebacterium coyleae</i> DSM 44184(T)(X96497)          | 100.00% (706/706)            | KT345659          |
| 4      | U58         | <i>Barrientosiimonas humi</i> 39(T)(JF346171)                | 99.93% (1438/1439)           | KT345635          |
| 5      | GH81        | <i>Dietzia schimae</i> YIM 65001(T) (EU375845)               | 98.64% (1380/1399)           | MF101695          |
| 6      | GM17        | <i>Glycomyces lechevalierae</i> NRRL B-16149(T) (AY462041)   | 99.21% (1373/1384)           | MH236182          |
| 7      | GHP2        | <i>Janibacter indicus</i> 0704P10-1(T) (HM222655)            | 99.78% (1333/1336)           | MF101680          |
| 8      | UAC17       | <i>Microbacterium invictum</i> DC-200(T)(AM949677)           | 98.79% (1393/1410)           | KT345651          |
| 9      | GH12        | <i>Arthrobacter globiformis</i> NBRC 12137(T) (BAEG01000072) | 98.60% (1334/1353)           | MF101713          |
| 10     | U67         | <i>Kocuria palustris</i> DSM 11925(T) (Y16263)               | 100.00% (998/998)            | KT345636          |
| 11     | GP2         | <i>Micrococcus terreus</i> CGMCC 1.7054(T) (jgi.1058018)     | 99.52% (1437/1444)           | MF101699          |
| 12     | GHP3        | <i>Rothia dentocariosa</i> ATCC 17931(T)(CP002280)           | 99.92% (1313/1314)           | MF101707          |
| 13     | GH99        | <i>Micromonospora aurantiaca</i> ATCC 27029(T) (CP002162)    | 99.65% (1432/1437)           | MF101683          |
| 14     | UAC16       | <i>Gordonia terrae</i> NBRC 100016(T) (BAFD01000032)         | 99.78% (1423/1426)           | KT345650          |
| 15     | UAC255      | <i>Rhodococcus yunnanensis</i> YIM 70056(T) (AY602219)       | 99.84% (638/639)             | MH236179          |
| 16     | GH118       | <i>Aeromicrobium ponti</i> HSW-1(T) (AM778683)               | 98.85% (1379/1395)           | MF101688          |
| 17     | UAC28       | <i>Marmoricola pocheonensis</i> Gsoil 818 (T) (GQ339906)     | 97.64% (1327/1359)           | MH236180          |
| 18     | UAC 5       | <i>Nocardioides aromaticivorans</i> H-1 (T) (AB087721)       | 99.70% (949/951)             | MH236181          |
| 19     | GH119       | <i>Cellulosimicrobium funkei</i> ATCC BAA-886 (T) (AY501364) | 99.31% (734/739)             | MF101704          |
| 20     | GH176       | <i>Streptomyces gancidicus</i> NBRC15412(T) (AB184660)       | 99.51% (1427/1434)           | MH236178          |
| 21     | GH71        | <i>Actinomadura apis</i> IM17-1(T) (AB557596)                | 99.68% (622/624)             | MF101706          |

**Table S2** Composition of the fermentation media used for the extract preparation

| <b>Fermentation media</b> | <b>Composition (gm/L)</b>                                                                                                          |
|---------------------------|------------------------------------------------------------------------------------------------------------------------------------|
| <b>GLM medium</b>         | Yeast extract: 3, malt extract: 3, peptone: 5, glucose: 10 (pH- 7.2)                                                               |
| <b>CYSP medium</b>        | Casein hydrolysate:10, starch: 10, yeast extract: 1, peptone: 1, (pH- 7.2)                                                         |
| <b>MGYP medium</b>        | Maltose : 3, glucose: 10gm, yeast extract: 3, peptone: 5, (pH- 7.2)                                                                |
| <b>Medium 333</b>         | Glucose: 5, peptone: 3, soluble starch: 10, yeast extract 3, CaCO <sub>3</sub> : 2, NH <sub>4</sub> NO <sub>3</sub> : 3, (pH- 7.2) |

**Table S3** Distribution of the number of genera and species to each family along with the relative abundance

| <b>Sr. No</b> | <b>Actinobacterial family</b> | <b>Actinobacterial genus</b> | <b>Number of species</b> | <b>Relative abundance (%)</b> |
|---------------|-------------------------------|------------------------------|--------------------------|-------------------------------|
| 1             | <i>Brevibacteriaceae</i>      | <i>Brevibacterium</i>        | 1                        | 1.20                          |
| 2             | <i>Cellulomonadaceae</i>      | <i>Cellulomonas</i>          | 1                        | 1.20                          |
| 3             | <i>Corynebacteriaceae</i>     | <i>Corynebacterium</i>       | 1                        | 1.20                          |
| 4             | <i>Dermacoccaceae</i>         | <i>Barrientosiimonas</i>     | 1                        | 1.20                          |
| 5             | <i>Dietziaceae</i>            | <i>Dietzia</i>               | 3                        | 3.60                          |
| 6             | <i>Glycomycetaceae</i>        | <i>Glycomyces</i>            | 1                        | 1.20                          |
| 7             | <i>Intrasporangiaceae</i>     | <i>Janibacter</i>            | 1                        | 1.20                          |
| 8             | <i>Microbacteriaceae</i>      | <i>Microbacterium</i>        | 5                        | 6.00                          |
| 9             | <i>Micrococcaceae</i>         | <i>Arthrobacter</i>          | 3                        | 17.07                         |
|               |                               | <i>Kocuria</i>               | 1                        |                               |
|               |                               | <i>Micrococcus</i>           | 4                        |                               |
|               |                               | <i>Rothia</i>                | 1                        |                               |
| 10            | <i>Micromonosporaceae</i>     | <i>Micromonospora</i>        | 3                        | 8.50                          |
| 11            | <i>Nocardiaceae</i>           | <i>Gordonia</i>              | 1                        | 6.00                          |
|               |                               | <i>Rhodococcus</i>           | 3                        |                               |
| 12            | <i>Nocardioideaceae</i>       | <i>Aeromicrobium</i>         | 1                        | 17.07                         |
|               |                               | <i>Mormoricola</i>           | 1                        |                               |
|               |                               | <i>Nocardioides</i>          | 2                        |                               |
| 13            | <i>Promicromonosporaceae</i>  | <i>Cellulosimicrobium</i>    | 1                        | 1.20                          |
| 14            | <i>Streptomycetaceae</i>      | <i>Streptomyces</i>          | 15                       | 25.60                         |
| 15            | <i>Thermomonosporaceae</i>    | <i>Actinomadura</i>          | 1                        | 1.20                          |

**Table S4** Antimicrobial activity of the extracts showing the growth inhibition of test cultures based on the diameter of the zone of inhibition

| Actinobacteria<br>Strain          | Media* | Test organisms# (zone of inhibition in (mm)) |    |    |    |    |    |    |
|-----------------------------------|--------|----------------------------------------------|----|----|----|----|----|----|
|                                   |        | 1                                            | 2  | 3  | 4  | 5  | 6  | 7  |
| <i>Micronomospora</i> sp.<br>GH99 | GLM    | 13                                           | 19 | 14 | 15 | 18 | 13 | ND |
|                                   | MGYP   | 12                                           | 24 | 16 | 15 | 21 | 22 | ND |
|                                   | M333   | 18                                           | 21 | 19 | 22 | 21 | 23 | ND |
|                                   | CYSP   | 16                                           | 12 | 14 | 15 | 20 | 21 | ND |
| <i>Streptomyces</i> sp.<br>GH176) | GLM    | 10                                           | 12 | 13 | 16 | 12 | 17 | 13 |
|                                   | MGYP   | 23                                           | 21 | 18 | 16 | 19 | 23 | 18 |
|                                   | M333   | 18                                           | 22 | 12 | ND | ND | 18 | 17 |
|                                   | CYSP   | ND                                           | 19 | 19 | 12 | 18 | 10 | 10 |

**Foot note:**

(\*): Production media used for fermentation and extraction, GLM: Glucose-yeast extract-malt medium, MGYP: Malt extract-Glucose-Yeast extract-Peptide medium, CYSP: Casein hydrolysate-Yeast extract-Starch-Peptide. M333: Wort Medium (HiMedia), ND: not detected

(#): Test microorganism used for antimicrobial activity, **1:** *Escherichia coli* (NCIM2563), **2:** *Staphylococcus epidermidis* (NCIM2493), **3:** *Shigella flexneri* (NCIM5265), **4:** *Klebsiella pneumonia* (NCIM2098), **5:** *Salmonella abony* (NCIM2257), **6:** *Micrococcus luteus* (NCIM2704), **7:** *Candida tropicalis* (NCIM3556).

**Table S5** MS/MS spectra of the compounds matched with the online database and Mass Frontier

| Sr. No. | Metabolites                    | Mol. formula                                                  | MS-MS fragments match                                  | Reference     |
|---------|--------------------------------|---------------------------------------------------------------|--------------------------------------------------------|---------------|
| 1       | Brevianamide F                 | C <sub>16</sub> H <sub>17</sub> N <sub>3</sub> O <sub>2</sub> | 284.13, 267.11, 170.06, 130.06, 118.06, 98.06          | GNPS Database |
| 2       | cyclo(D-Pro-L-Phe              | C <sub>14</sub> H <sub>16</sub> N <sub>2</sub> O <sub>2</sub> | 245.12, 217.13, 154.07, 120.08, 91.05                  | GNPS Database |
| 3       | cyclo(L-Pro-L-Val)             | C <sub>10</sub> H <sub>16</sub> N <sub>2</sub> O <sub>2</sub> | 197.12, 169.13, 154.07, 124.11, 113.07, 84.08          | GNPS Database |
| 4       | 22-dehydroxymethyl - Kijanolid | C <sub>32</sub> H <sub>42</sub> O <sub>6</sub>                | 523.30, 523.30, 385.19, 349.16, 111.08, 85.06          | Mass Frontier |
| 5       | Abyssomicin I                  | C <sub>19</sub> H <sub>24</sub> O <sub>6</sub>                | 347.24, 305.08, 275.07, 219.01, 203.05, 185.04, 152.03 | Mass Frontier |
| 6       | Terpentecin                    | C <sub>20</sub> H <sub>28</sub> O <sub>6</sub>                | 365.23, 319.12, 251.09, 171.07, 141.09, 71.09          | Mass Frontier |

## Supplementary figures

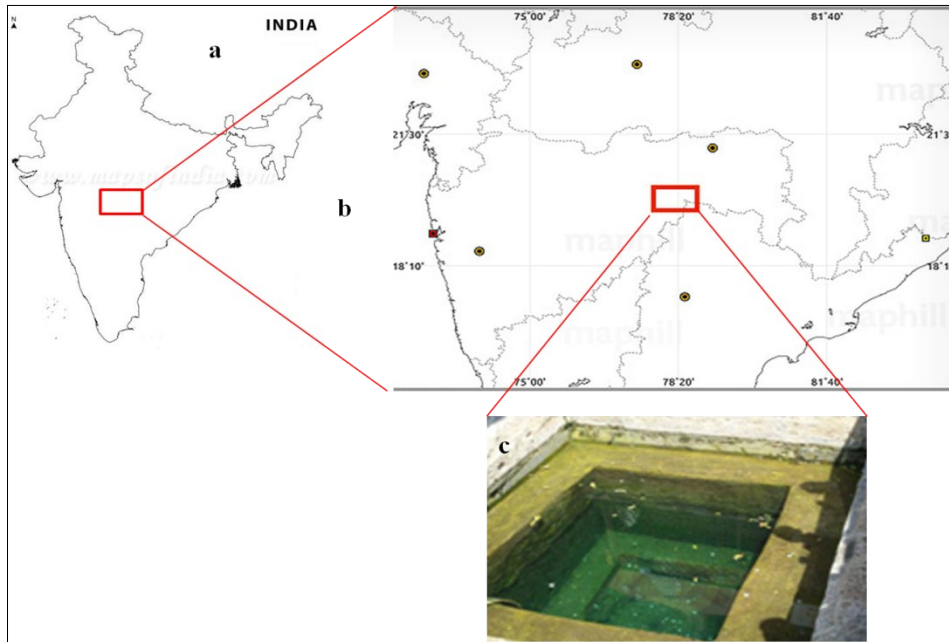

**Fig.S1** Description of the sampling site a: a map of India showing the location of hot spring, b: highlights the Unkeshwar region in the map, c: Unkeshwar hot spring

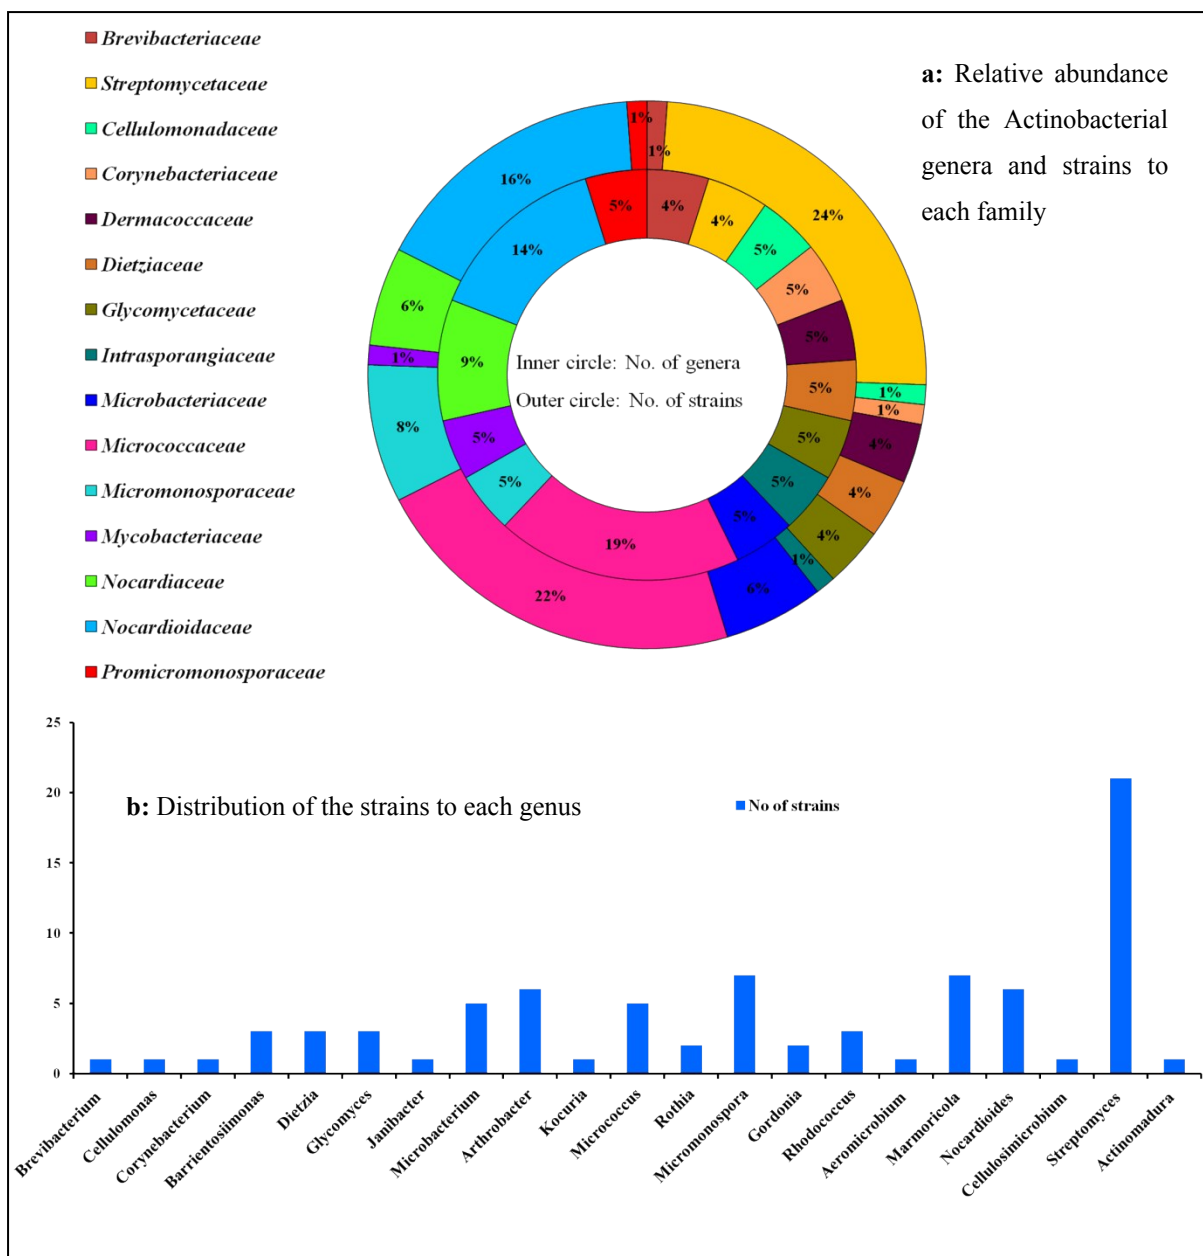

**Fig. S2** Distribution of the number of genera and strain to each actinobacterial family (a), Number of strains distributed to each actinobacterial genus (b)

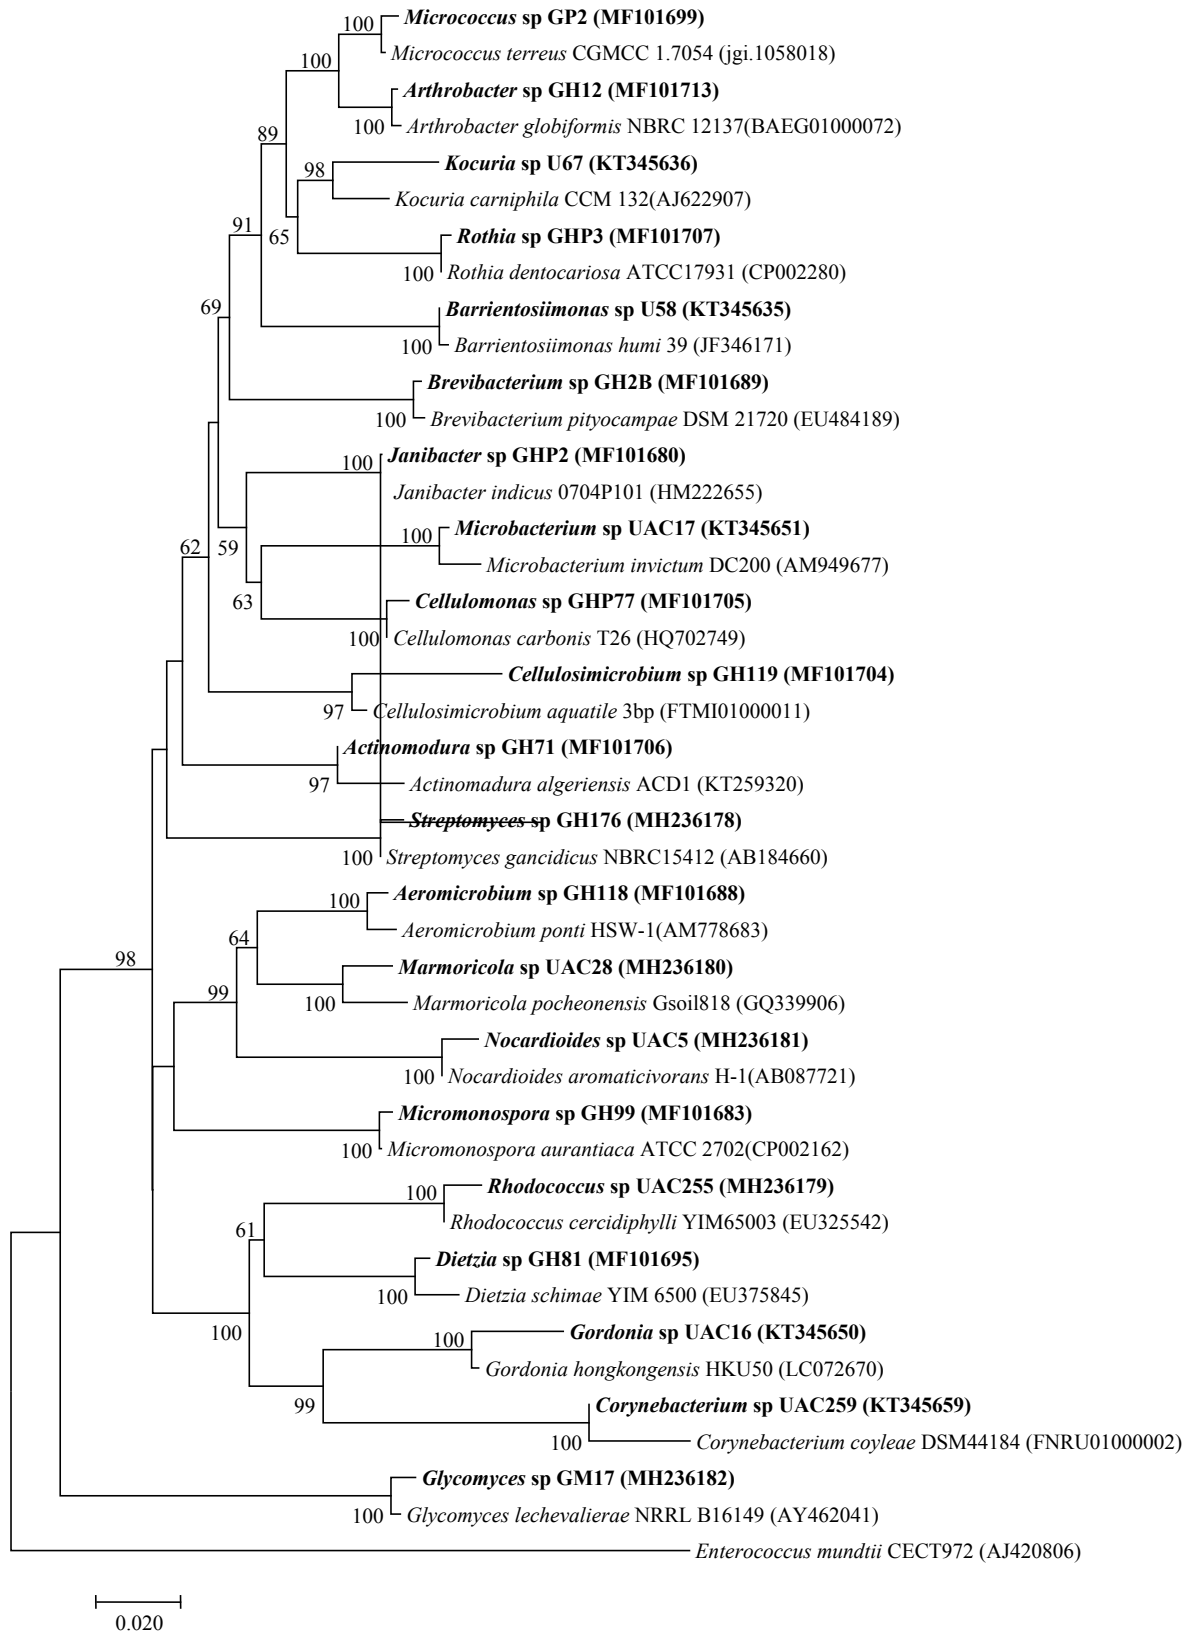

**Fig. S3** Neighbor-joining phylogenetic tree based on 16S rRNA gene sequences of the representative strains with bootstrap values expressed as percentages of 1000 replications

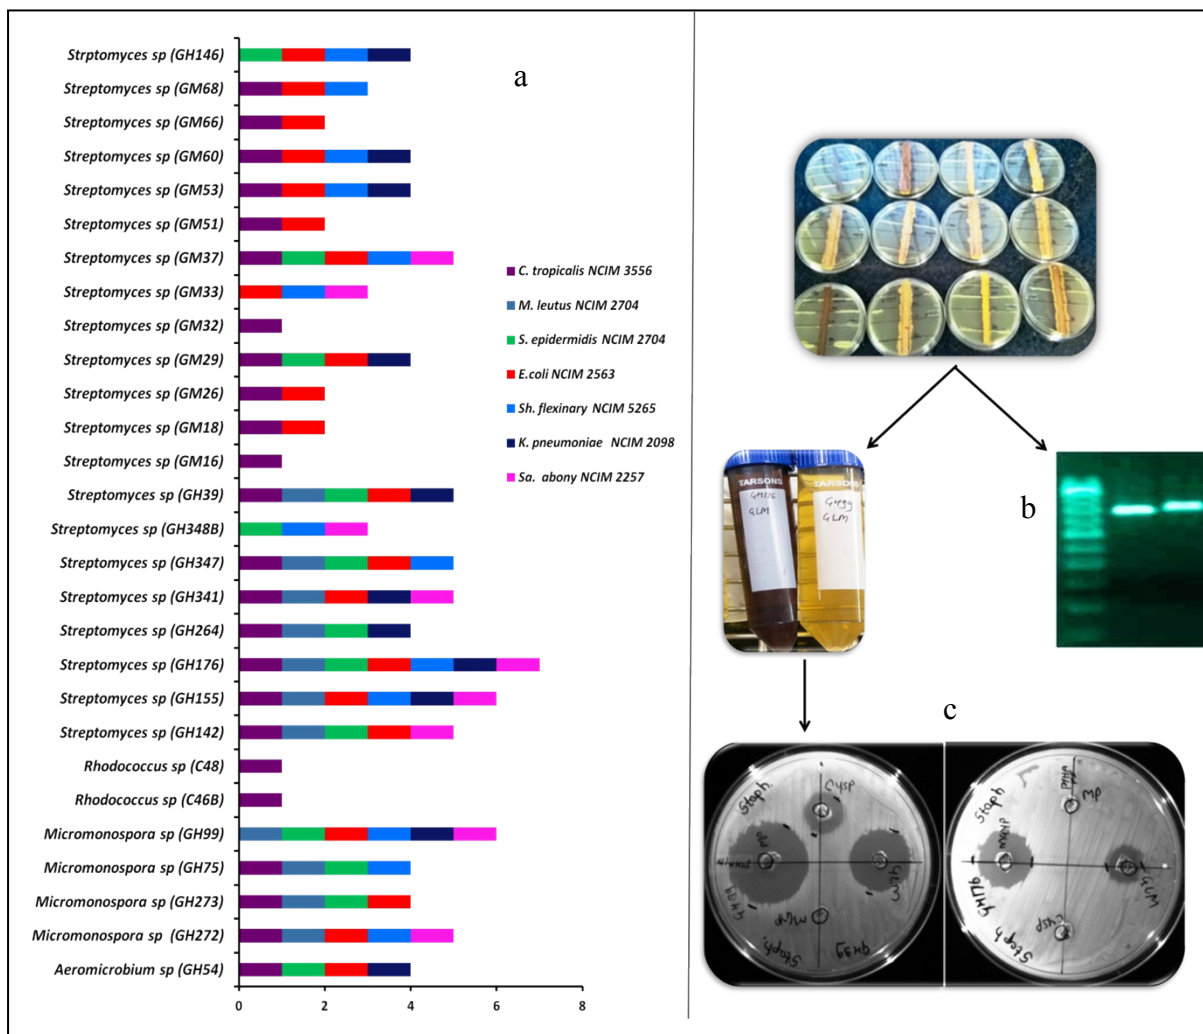

**Fig. S4** Antimicrobial screening of the isolated strains, a: number of positive strain showing antimicrobial activity against the pathogenic cultures, b: a gel image of PKS-I gene of two potent GH99 and GH176 strains, c: Showing the antimicrobial activity of the extract against staphylococcus epidermis of the extract prepared from GH99 and GH176 strains



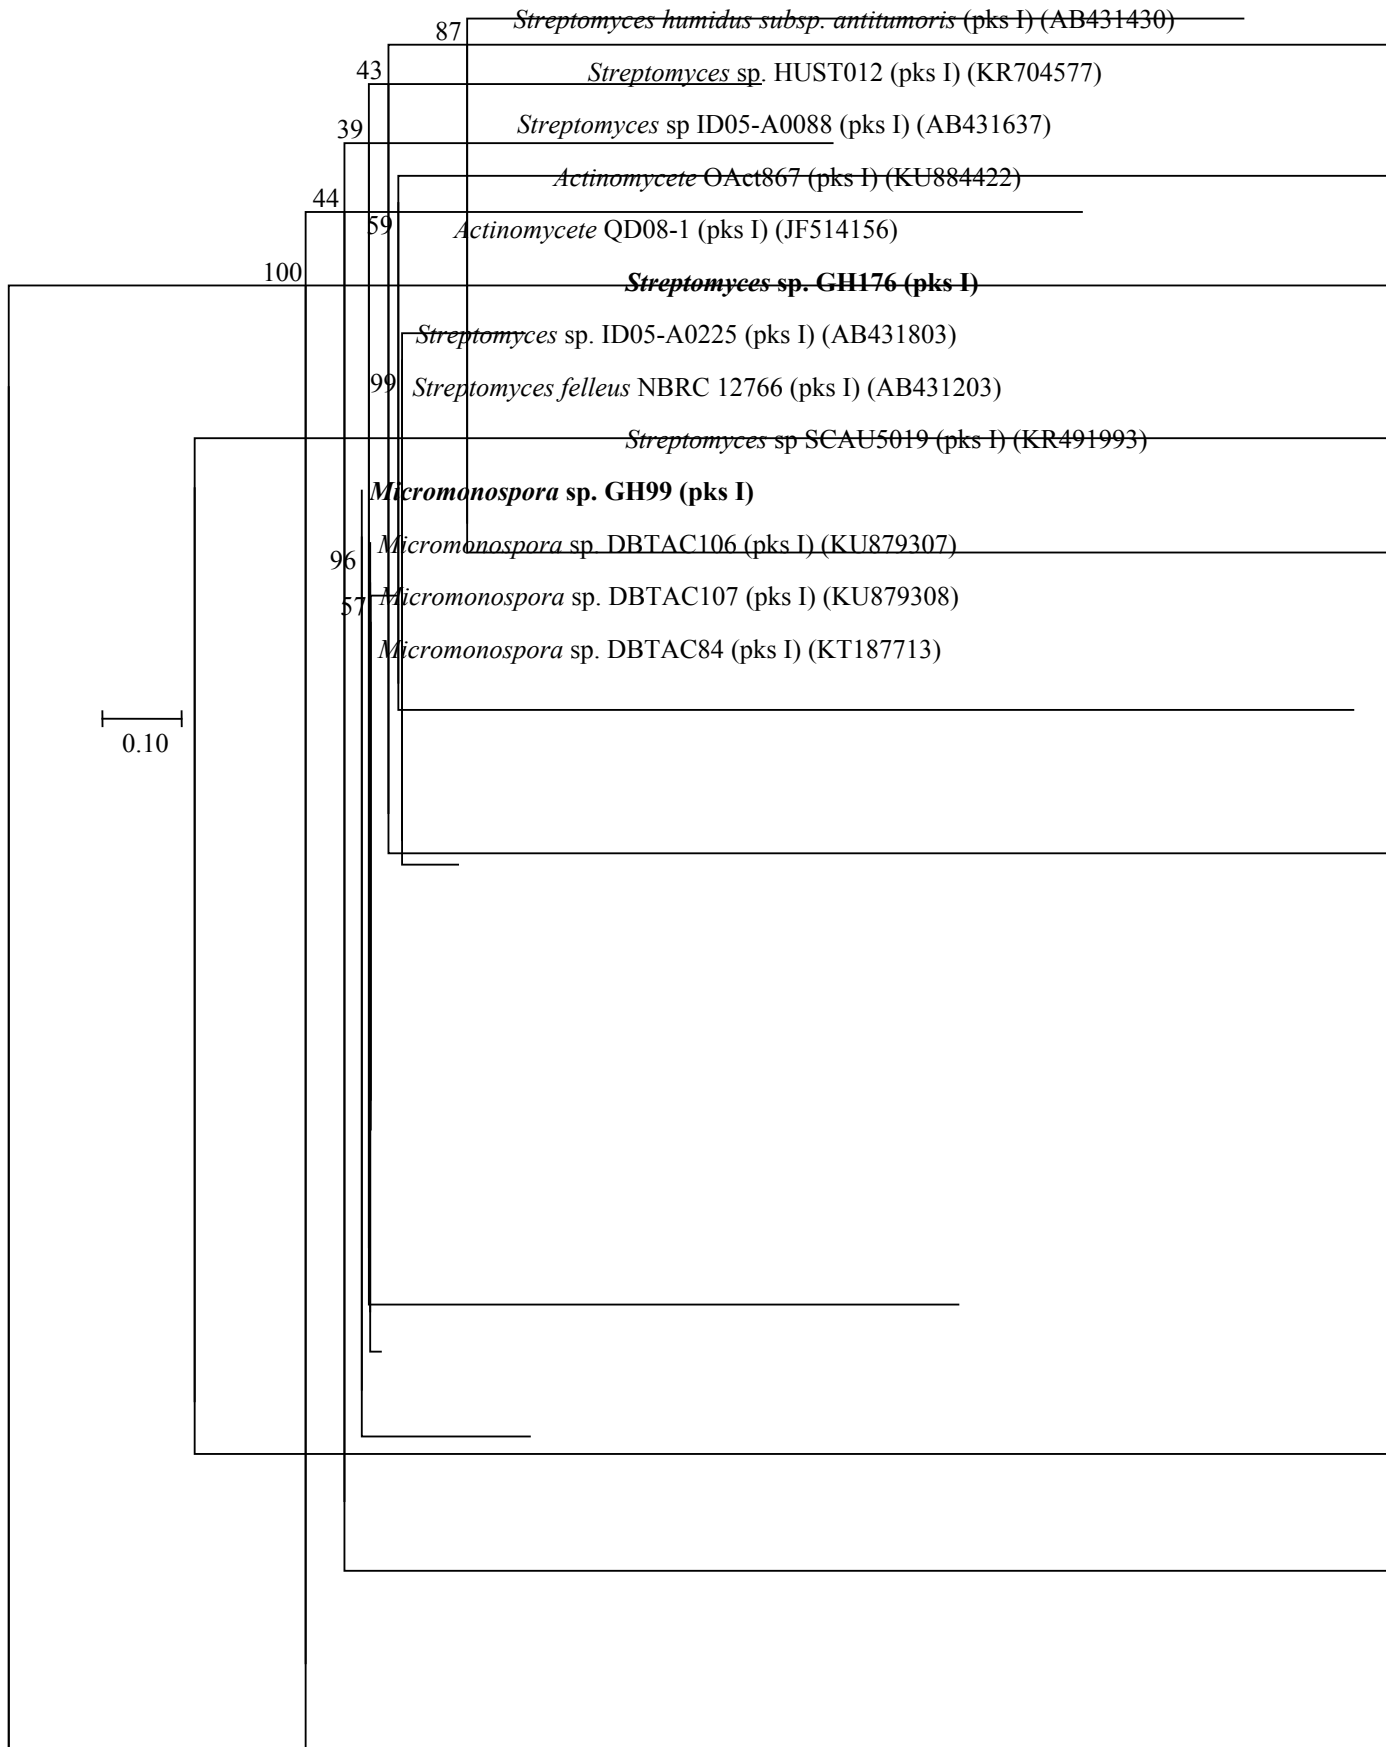

**Fig. S5** Neighbor-joining phylogenetic tree of the PKS gene (PKS-I) showing the cluster of closest neighbor of the database. Bootstrap values were expressed as percentages of 1000 replications

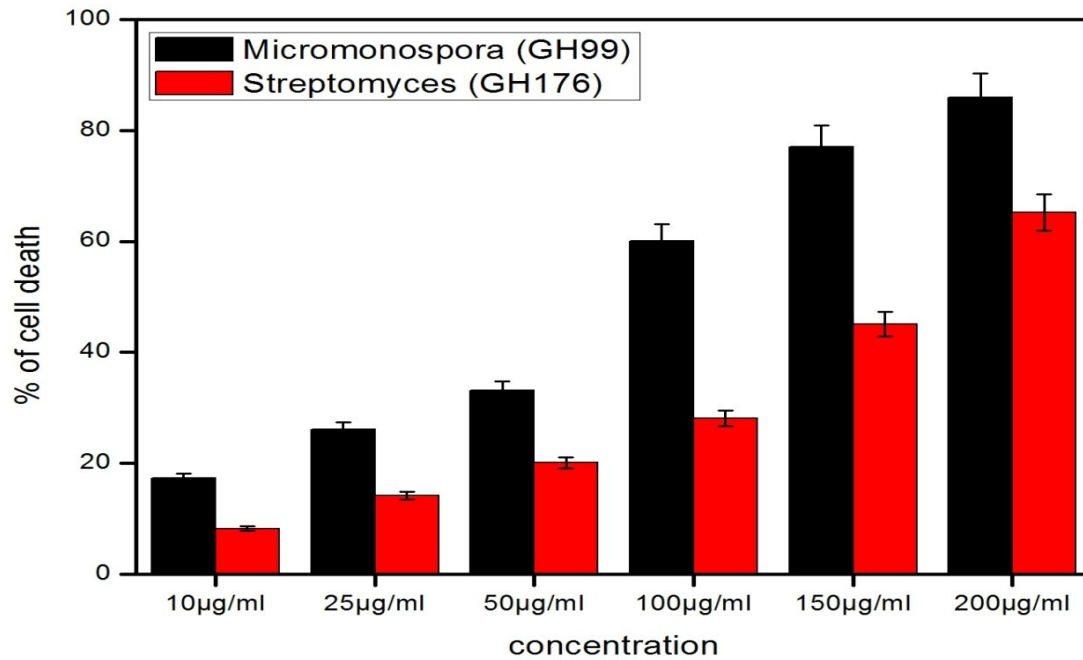

**Fig. S6** Screening for anticancer potential of the extracts of *Micromonospora* sp. strain GH99 (black) and *Streptomyces* sp. GH176 (red) strains against breast cancer cell line MCF7

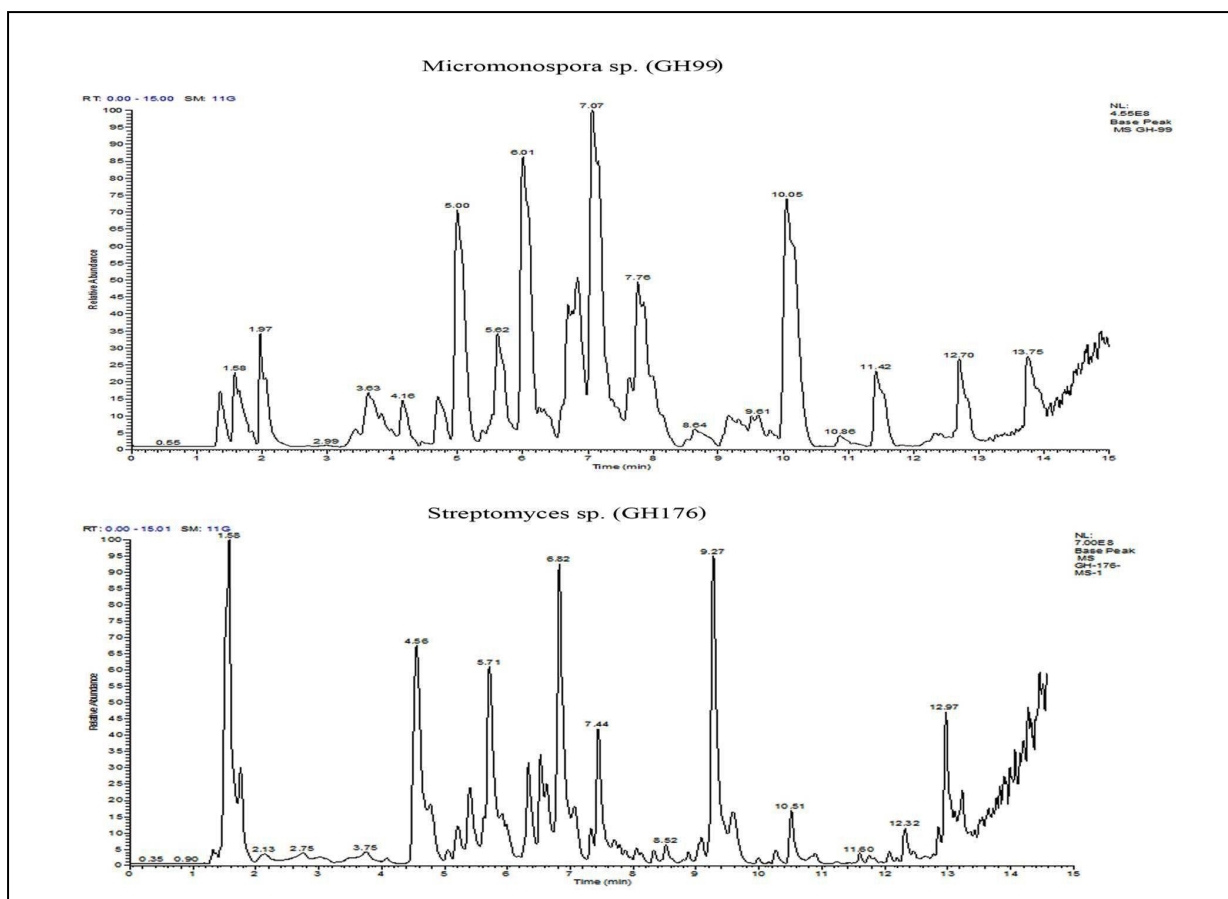

**Fig. S7** LC-MS profiling of the crude extracts obtained from the *Micromonospora* sp. GH99 and *Streptomyces* sp. GH176 strains
